1     **DeepImageTranslator V2: analysis of multimodal medical images**  
2     **using semantic segmentation maps generated through deep learning**

3

4                     En Zhou Ye<sup>1\*</sup>, En Hui Ye<sup>2\*</sup>, and Run Zhou Ye<sup>3</sup>

5     From the <sup>1</sup> Saint-Laurent Academy, Ottawa, Ontario, Canada. <sup>2</sup> Saint-Josephine High School,

6     Ottawa, Ontario, Canada. <sup>3</sup> Division of Endocrinology, Department of Medicine, *Centre de*

7     *recherche du Centre hospitalier universitaire de Sherbrooke, Université de Sherbrooke,*

8     Sherbrooke, Quebec, Canada

9     \* These authors contributed equally to this work.

10

11     **Corresponding author:**

12     Run Zhou Ye

13     Division of Endocrinology, Department of Medicine, *Centre de recherche du Centre hospitalier*

14     *universitaire de Sherbrooke, Université de Sherbrooke, Sherbrooke, Quebec, Canada*

15     3001, 12th Ave North, Sherbrooke, Quebec, Canada, J1H 5N4

16     Tel: 873-888-7979

17     E-mail: Run.Zhou.Ye@usherbrooke.ca

18

19     **Running title:** Tool for segmentation analysis of multimodal medical images

20     **Keywords:** multimodal medical imaging, semantic segmentation, regions of interest, deep

21     learning, software, PET/CT imaging

## ABSTRACT

22  
23 **Introduction:** Analysis of multimodal medical images often requires the selection of one or  
24 many anatomical regions of interest (ROIs) for extraction of useful statistics. This task can prove  
25 laborious when a manual approach is used. We have previously developed a user-friendly  
26 software tool for image-to-image translation using deep learning. Therefore, we present herein an  
27 update to the DeepImageTranslator software with the addition of a tool for multimodal medical  
28 image segmentation analysis (hereby referred to as the MMMISA).

29 **Methods:** The MMMISA was implemented using the Tkinter library; backend computations  
30 were implemented using the Pydicom, Numpy, and OpenCV libraries. We tested our software  
31 using 4188 whole-body axial 2-deoxy-2-[<sup>18</sup>F]-fluoroglucose-positron emission  
32 tomography/computed tomography ([<sup>18</sup>F]-FDG-PET/CT) slices of 10 patients from the ACRIN-  
33 HNSCC (American College of Radiology Imaging Network-Head and Neck Squamous Cell  
34 Carcinoma) database. Using the deep learning software DeepImageTranslator, a model was  
35 trained with 36 randomly selected CT slices and manually labelled semantic segmentation maps.  
36 Utilizing the trained model, all the CT scans of the 10 HNSCC patients were segmented with  
37 high accuracy. Segmentation maps generated using the deep convolutional network were then  
38 used to measure organ specific [<sup>18</sup>F]-FDG uptake. We also compared measurements performed  
39 using the MMMISA and those made with manually selected ROIs.

40 **Results:** The MMMISA is a tool that allows user to select ROIs based on deep learning-  
41 generated segmentation maps and to compute accurate statistics for these ROIs based on  
42 coregistered multimodal images. We found that organ-specific [<sup>18</sup>F]-FDG uptake measured using  
43 multiple manually selected ROIs is concordant with whole-tissue measurements made with  
44 segmentation maps using the MMMISA tool.

## 45 INTRODUCTION

46 Analysis of multimodal medical images (*e.g.*, position emission tomography/magnetic resonance  
47 imaging [PET/MRI] and PET/computed tomography [PET/CT]) often requires the selection of one  
48 or many anatomical regions of interest (ROIs) for extraction of useful statistics [1-6]. The use of  
49 spherical or ellipsoid ROIs may be sufficient for large organs such as the liver and large muscle  
50 groups. However, for organs/tissues with complex shapes (*e.g.*, the intestines and adipose tissues),  
51 manual ROI segmentation is not a scalable approach. One possible method is the use of deep  
52 learning for automated segmentation. Nevertheless, most deep learning pipelines for semantic  
53 image segmentation generate color-coded segmentation maps stored as image files, while most  
54 free software programs for medical image analysis (*e.g.*, 3D-Slicer, OsiriX Lite, and AMIDE)  
55 cannot use these files to generate ROI statistics of multimodal images stored as DICOM files.

56 We have previously developed a user-friendly software tool for image-to-image translation  
57 using deep learning (DeepImageTranslator, described in [7], released at:  
58 <https://sourceforge.net/projects/deepimagertranslator/>). Therefore, we present herein an update to  
59 the DeepImageTranslator software with the addition of a tool for multimodal medical image  
60 segmentation analysis (hereby referred to as the MMMISA). We then demonstrate the use of the  
61 program for the measurement of 2-deoxy-2-[<sup>18</sup>F]fluoroglucose ([<sup>18</sup>F]-FDG) uptake by the lungs  
62 and subcutaneous adipose tissue using whole-body [<sup>18</sup>F]-FDG-PET/CT scans from the ACRIN-  
63 HNSCC-FDG-PET/CT database [8-10]. Furthermore, we also compare measurements performed  
64 using the MMMISA and those made with manually selected ROIs.

65

## 66 **METHODS**

### 67 **Development of the MMMISA program**

68 The MMMISA program presented herein was written in Python 3.8 and distributed under the GNU  
69 General Public License (version 3.0). The graphical user interface was developed using the Tkinter  
70 library. Image analysis algorithms were implemented using the Pydicom, Numpy, and OpenCV  
71 libraries. The program is included as part of version 2 of the DeepImageTranslator software  
72 (<https://sourceforge.net/projects/deepimagertranslator/>) and is also available as a standalone  
73 program (<https://sourceforge.net/projects/mmmisa/>) for Windows. The source codes are available  
74 at: (<https://github.com/runzhouye/MMMISA>).

75

### 76 **PET/CT image dataset**

77 Whole-body CT and FDG-PET images from 10 patients (numbers 001, 002, 003, 007, 008, 010,  
78 012, 018, 019, and 027) were downloaded from the ACRIN-HNSCC-FDG-PET/CT (ACRIN  
79 6685) database [8, 9] via the Cancer Institute Archive [10].

80

### 81 **Manual extraction of multimodal image data**

82 CT and FDG-PET images were loaded into the AMIDE software [11]. For each patient, 11  
83 spherical ROIs (10 mm diameter) in the subcutaneous adipose tissue and 3 spherical ROIs (50 mm  
84 diameter) in the lungs were drawn at different axial positions based on whole-body CT images.  
85 ROI statistics were subsequently generated for the coregistered PET images.

86

87

88

## 89 **Semantic image segmentation**

90 Thirty-six axial slices were randomly chosen from the 4188 axial CT images from the 10 patients  
91 for manual semantic segmentation with the GIMP (GNU Image Manipulation Program) software  
92 of the background, lungs, bones, brain, subcutaneous and visceral adipose tissue, and other soft  
93 tissues by labelling these tissues in black (RGB=[0,0,0]), yellow (RGB=[255,255,0]), white  
94 (RGB=[255,255,255]), cyan (RGB=[0,255,255]), red (RGB=[255,0,0]), green (RGB=[0,255,0]),  
95 and blue (RGB=[0,0,255]). CT image-segmentation map pairs were then loaded into the  
96 DeepImageTranslator software to train a deep convolutional neural network as previously  
97 described in Ye et al. [] with 1000 training epochs. The final model was used to perform automatic  
98 semantic segmentation of the 4188 axial CT images from the 10 patients in less than 10 minutes.

99

## 100 **Automated extraction of multimodal image data**

101 For each patient, the original PET/CT scans were loaded into the MMMISA program along with  
102 the semantic segmentation maps produced by the convolutional neural network. In this study, we  
103 chose to extract FDG uptake from the lungs and subcutaneous adipose tissue by extracting regions  
104 of the model-generated segmentation maps containing yellow and red pixels, respectively using  
105 the MMMISA program. Lower and upper color threshold were set at (R,G,B) = (150,150,0) and  
106 (R,G,B) = (255,255,150), respectively, for the lungs, and (R,G,B) = (150,0,0) and (R,G,B) =  
107 (255,150,150), respectively, for the subcutaneous adipose tissue. ROI statistics were then  
108 generated for the FDG-PET scans using the MMMISA software.

109

110

111

## 112 **Statistical analyses**

113 Statistical analyses were carried out using GraphPad Prism version 9. Pearson's R values were  
114 computed for the correlation between organ-specific FDG uptake measured using multiple  
115 manually selected ROIs and FDG uptake determined using deep learning-generated segmentation  
116 maps.

117

## 118 **Data availability**

119 The source code for the DeepImageTranslator is publicly available at:

120 <https://github.com/runzhouye/MMMISA>

121 The compiled standalone software is available for Window10 at:

122 <https://sourceforge.net/projects/deepimagertranslator/> and

123 <https://sourceforge.net/projects/mmmisa/>

124 The datasets generated during and/or analyzed during the current study are available at:

125 <https://doi.org/10.6084/m9.figshare.16800925>

126

## 127 **RESULTS**

### 128 **The MMMISA plugin for the DeepImageTranslator**

129 The MMMISA program is included in version 2 of the DeepImageTranslator and is also available  
130 as a standalone software. The main window (**Fig.1**) allows for the user to visualize single- and  
131 dual-modality images written in the standard DICOM (Digital Imaging and Communications in  
132 Medicine) file format, the most commonly used file format in medical imaging. When images from

133 a second modality are loaded into the program, they are automatically matched, along with the  
134 corresponding segmentation map, to the image of the first modality that is being currently  
135 displayed. When necessary, the program also performs image registration of modality 2 images  
136 based on modality 1 images through translation and/or stretching such that objects in both image  
137 sets overlap. This allows for simultaneous visualization of both image sets and segmentation maps.

138 A second, ROI selection, window (**Fig.2**) displays user settings for the extraction of ROIs  
139 based on pixel colors of the segmentation maps. Specific regions of the color-coded semantic  
140 segmentation maps can be extracted by setting lower and upper thresholds for the red, green, and  
141 blue color component values using the ROI selection window. The user can also choose to only  
142 include the left or right side of the patient for analysis, which can be useful in order to exclude the  
143 strong signals from of certain radiotracers injected into the left or right arm. When the “Apply”  
144 button is pressed, ROIs are generated based on the color thresholds using the segmentation maps  
145 and applied to corresponding slices of modality 1 and 2 images. The cropped images are then  
146 displayed in the main window for visualization.

147 When “Save analysis” is selected, data will be extracted from modality 1 and 2 images,  
148 including the name of the scan, time at which each slice was produced, position of image slices,  
149 total area of the ROIs on each slice, total pixel values in the ROIs, average and standard deviation  
150 of values of pixels inside the ROIs, and pixel size. Results are then written in an excel file and  
151 stored under the user-designated directory.

152

### 153 **Semantic segmentation of PET/CT images**

154 Segmentation results for images outside of the training set obtained with the convolutional neural  
155 network trained using the DeepImageTranslator were illustrated in **Fig.3**. Our final model was able

156 to accurately segment the lungs, brain, bone, subcutaneous and visceral adipose tissue, and other  
157 soft tissues.

158

159 **Increase in number of manually selected ROIs increases accuracy of organ-specific FDG**  
160 **uptake approximations compared to true organ-specific FDG uptake measured using deep**  
161 **learning-generated segmentation maps**

162 Next, we tested the concordance of organ-specific FDG uptake measured using multiple manually  
163 selected ROIs *versus* FDG uptake determined using deep learning-generated segmentation maps.

164 In general, regardless the number of ROIs used, manually measured FDG uptake in the lungs and  
165 subcutaneous adipose tissue was well correlated with that calculated with segmentation maps using  
166 the MMMISA program (**Fig.4**). For subcutaneous adipose tissue FDG uptake, the correlation  
167 coefficient and the -log of the P-value increased sharply once values from more than 4 ROIs were  
168 combined (**Fig.4A**). Increase in measurement accuracy (determined by the correlation coefficient)  
169 through increasing numbers of manually selected ROIs plateaued after more than 8 ROIs were  
170 used. Nevertheless, the P-value of the correlation between manual measurement and that using  
171 segmentation maps continued to decrease when more ROIs were used (**Fig.4B**). Similar results  
172 were obtained for the measurement of FDG uptake in the lungs (**Fig.4C-D**).

173

174 **DISCUSSION**

175 In recent years, numerous open-source software tools have been reported in the field of medical  
176 image processing [12-16]. One growing area of development is the popularization of deep learning  
177 methods through the creation of user-friendly tools with a graphical interface. Nevertheless, most  
178 deep learning pipelines for semantic image segmentation generate color-coded segmentation maps



179 stored as image files, while most free software programs for medical image analysis cannot use  
180 these files to generate ROI statistics of multimodal images stored as DICOM files.

181         Nonetheless, selection of ROIs is an important aspect of *in vivo* metabolic studies involving  
182 PET/CT imaging [17-20]. In particular, measurements of volume and radiotracer uptake of adipose  
183 tissues of different regions may prove to be important for future studies on the metabolic syndrome,  
184 as hypertrophic obesity is related to changes in adipose tissue distribution and alterations in  
185 metabolic endpoints [21, 22].

186         Therefore, we have presented herein an update to the DeepImageTranslator software [7]  
187 by including a tool for multimodal medical image segmentation analysis based on semantic  
188 segmentation maps generated using a deep convolutional neural network. Our program can be  
189 accessed through a graphical interface and allows users to extract ROI statistics of multimodal  
190 images (*e.g.*, PET/CT and PET/MRI) based on color-coded semantic segmentation maps. We  
191 showed that organ-specific FDG uptake measured using multiple manually selected small,  
192 spherical ROIs is concordant with whole-tissue measurements made with segmentation maps using  
193 the MMMISA program. Furthermore, we found that increase in number of manually selected ROIs  
194 increases the accuracy of organ specific FDG uptake approximations. Therefore, our pipeline  
195 constitutes a simple, automated, and scalable approach to obtain ROI statistics using multimodal  
196 scans.

## 197 **DISCLOSURES**

198 The authors declare no competing interests.

## 199 **AUTHOR CONTRIBUTIONS**

200 Software development: EZY, EHY, and RZY. Statistical analyses: EHY. Manuscript drafting:  
201 EZY and RZY.

202    **REFERENCES**

- 203    1.     Lensen, K.D.F., et al., *Variability in quantitative analysis of atherosclerotic plaque inflammation*  
204        *using 18F-FDG PET/CT*. PLoS One, 2017. **12**(8): p. e0181847.
- 205    2.     Cao, Y., et al., *Subcutaneous adipose tissue free fatty acid uptake measured using positron*  
206        *emission tomography and adipose biopsies in humans*. Am J Physiol Endocrinol Metab, 2019.  
207        **317**(2): p. E194-E199.
- 208    3.     Noll, C., et al., *Seven-day overfeeding enhances adipose tissue dietary fatty acid storage and*  
209        *decreases myocardial and skeletal muscle dietary fatty acid partitioning in healthy subjects*. Am J  
210        Physiol Endocrinol Metab, 2020. **318**(2): p. E286-E296.
- 211    4.     Hojjati, M., et al., *Role of FDG-PET/MRI, FDG-PET/CT, and Dynamic Susceptibility Contrast*  
212        *Perfusion MRI in Differentiating Radiation Necrosis from Tumor Recurrence in Glioblastomas*. J  
213        Neuroimaging, 2018. **28**(1): p. 118-125.
- 214    5.     Montastier, E., et al., *Increased postprandial nonesterified fatty acid efflux from adipose tissue in*  
215        *prediabetes is offset by enhanced dietary fatty acid adipose trapping*. Am J Physiol Endocrinol  
216        Metab, 2021. **320**(6): p. E1093-E1106.
- 217    6.     Labbe, S.M., et al., *Increased myocardial uptake of dietary fatty acids linked to cardiac dysfunction*  
218        *in glucose-intolerant humans*. Diabetes, 2012. **61**(11): p. 2701-10.
- 219    7.     Ye, R.Z., et al., *DeepImageTranslator: a free, user-friendly graphical interface for image translation*  
220        *using deep-learning and its applications in 3D CT image analysis*. bioRxiv, 2021.
- 221    8.     Kinahan, P., Muzi, M., Bialecki, B., & Coombs, L. (2019). Data from the ACRIN 6685 Trial HNSCC-  
222        FDG-PET/CT [Data set]. TCIA. <https://doi.org/10.7937/K9/TCIA.2016.JQEJZNG>.
- 223    9.     Lowe, V.J., Duan, F., Subramaniam, R. M., Sicks, J. D., Romanoff, J., Bartel, T., Yu, J. Q. (Michael),  
224        Nussenbaum, B., Richmon, J., Arnold, C. D., Cognetti, D., & Stack, B. C., Jr. (2019). Multicenter Trial  
225        of [18F]fluorodeoxyglucose Positron Emission Tomography/Computed Tomography Staging of  
226        Head and Neck Cancer and Negative Predictive Value and Surgical Impact in the NO Neck: Results  
227        From ACRIN 6685. Journal of Clinical Oncology, 37(20), 1704–1712.  
228        <https://doi.org/10.1200/jco.18.01182>.
- 229    10.    Clark, K., Vendt, B., Smith, K., Freymann, J., Kirby, J., Koppel, P., Moore, S., Phillips, S., Maffitt, D.,  
230        Pringle, M., Tarbox, L., & Prior, F. (2013). The Cancer Imaging Archive (TCIA): Maintaining and  
231        Operating a Public Information Repository. Journal of Digital Imaging, 26(6), 1045–1057.  
232        <https://doi.org/10.1007/s10278-013-9622-7>.
- 233    11.    Loening, A.M. and S.S. Gambhir, *AMIDE: a free software tool for multimodality medical image*  
234        *analysis*. Mol Imaging, 2003. **2**(3): p. 131-7.
- 235    12.    Lessard, R., et al., *An open-source software for monitoring intrafraction motion during external*  
236        *beam radiation therapy based on superimposition of contours of projected ROIs on cine-MV*  
237        *images*. J Appl Clin Med Phys, 2020. **21**(8): p. 173-182.
- 238    13.    Yushkevich, P.A., et al., *User-Guided Segmentation of Multi-modality Medical Imaging Datasets*  
239        *with ITK-SNAP*. Neuroinformatics, 2019. **17**(1): p. 83-102.
- 240    14.    Bucking, T.M., et al., *From medical imaging data to 3D printed anatomical models*. PLoS One,  
241        2017. **12**(5): p. e0178540.
- 242    15.    Debus, C., et al., *MITK-ModelFit: A generic open-source framework for model fits and their*  
243        *exploration in medical imaging - design, implementation and application on the example of DCE-*  
244        *MRI*. BMC Bioinformatics, 2019. **20**(1): p. 31.
- 245    16.    Razeghi, O., et al., *CemrgApp: An interactive medical imaging application with image processing,*  
246        *computer vision, and machine learning toolkits for cardiovascular research*. SoftwareX, 2020. **12**:  
247        p. 100570.

- 248 17. Croteau, E., et al., *Image-derived input function in dynamic human PET/CT: methodology and*  
249 *validation with 11C-acetate and 18F-fluorothioheptadecanoic acid in muscle and 18F-*  
250 *fluorodeoxyglucose in brain*. Eur J Nucl Med Mol Imaging, 2010. **37**(8): p. 1539-50.
- 251 18. Lee, S.Y., et al., *Comparison of 3T diffusion-weighted MRI and (18)F-FDG PET/CT in musculoskeletal*  
252 *tumours: quantitative analysis of apparent diffusion coefficients and standardized uptake values*.  
253 Br J Radiol, 2019. **92**(1102): p. 20181051.
- 254 19. Richard, G., et al., *Contribution of perfusion to the (11) C-acetate signal in brown adipose tissue*  
255 *assessed by DCE-MRI and (68) Ga-DOTA PET in a rat model*. Magn Reson Med, 2021. **85**(3): p.  
256 1625-1642.
- 257 20. Carreau, A.M., et al., *Bariatric Surgery Rapidly Decreases Cardiac Dietary Fatty Acid Partitioning*  
258 *and Hepatic Insulin Resistance Through Increased Intra-abdominal Adipose Tissue Storage and*  
259 *Reduced Spillover in Type 2 Diabetes*. Diabetes, 2020. **69**(4): p. 567-577.
- 260 21. Ye, R.Z., et al., *Fat Cell Size: Measurement Methods, Pathophysiological Origins, and Relationships*  
261 *with Metabolic Dysregulations*. Endocr Rev, 2021.
- 262 22. Carpentier, A.C., *100(th) anniversary of the discovery of insulin perspective: insulin and adipose*  
263 *tissue fatty acid metabolism*. Am J Physiol Endocrinol Metab, 2021. **320**(4): p. E653-E670.

264

265 **FIGURES**

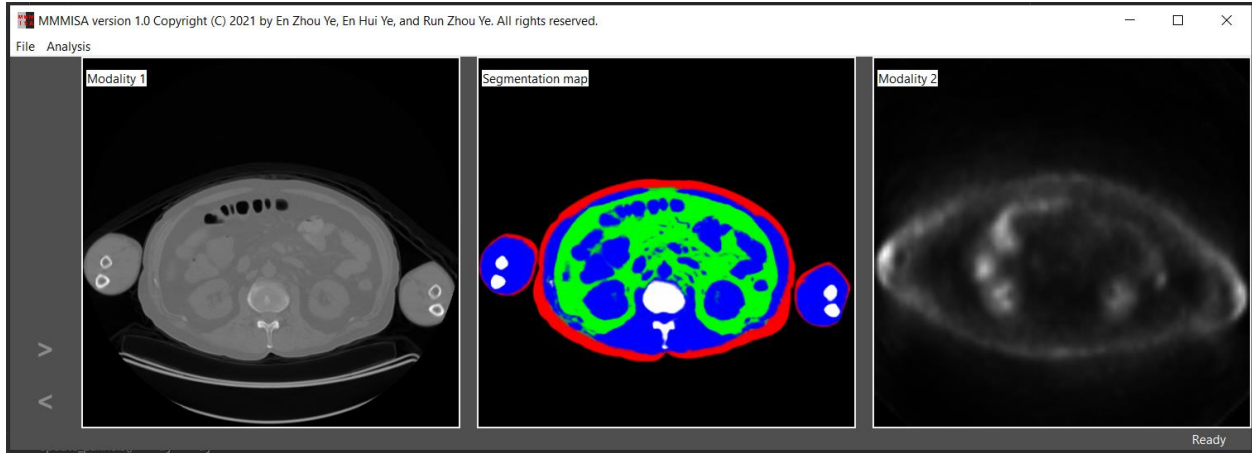

266

267 **Fig.1:** Main window of MMMISA, showing (from left to right), modality 1 (CT) images,  
268 segmentation maps generated with convolutional neural network, and modality 2 (PET) images.

269

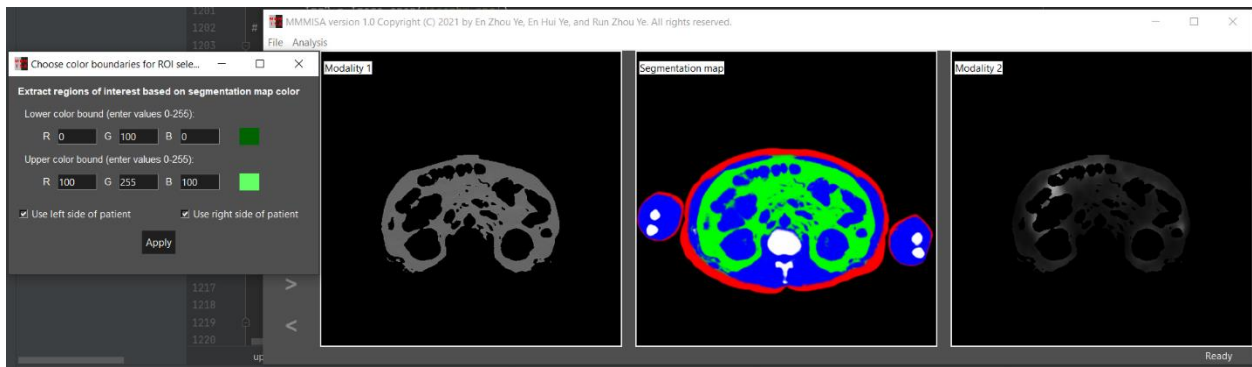

270

271 **Fig.2:** ROI selection window and main window with updated modality 1 and 2 images.

272

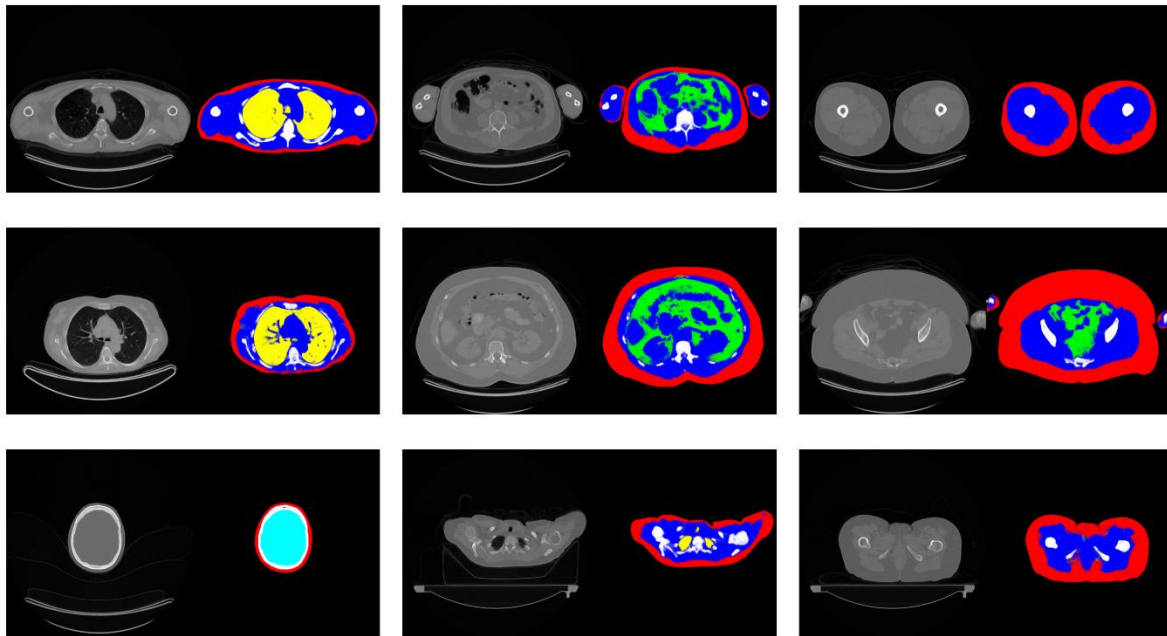

273

274 **Fig.3:** Pairs of CT images outside of the training set and semantic segmentation maps generated  
275 with deep convolutional neural network. The background, lungs, bones, brain, subcutaneous and  
276 visceral adipose tissue, and other soft tissues were labelled in black, yellow, white), cyan, red,  
277 green, and blue, respectively.

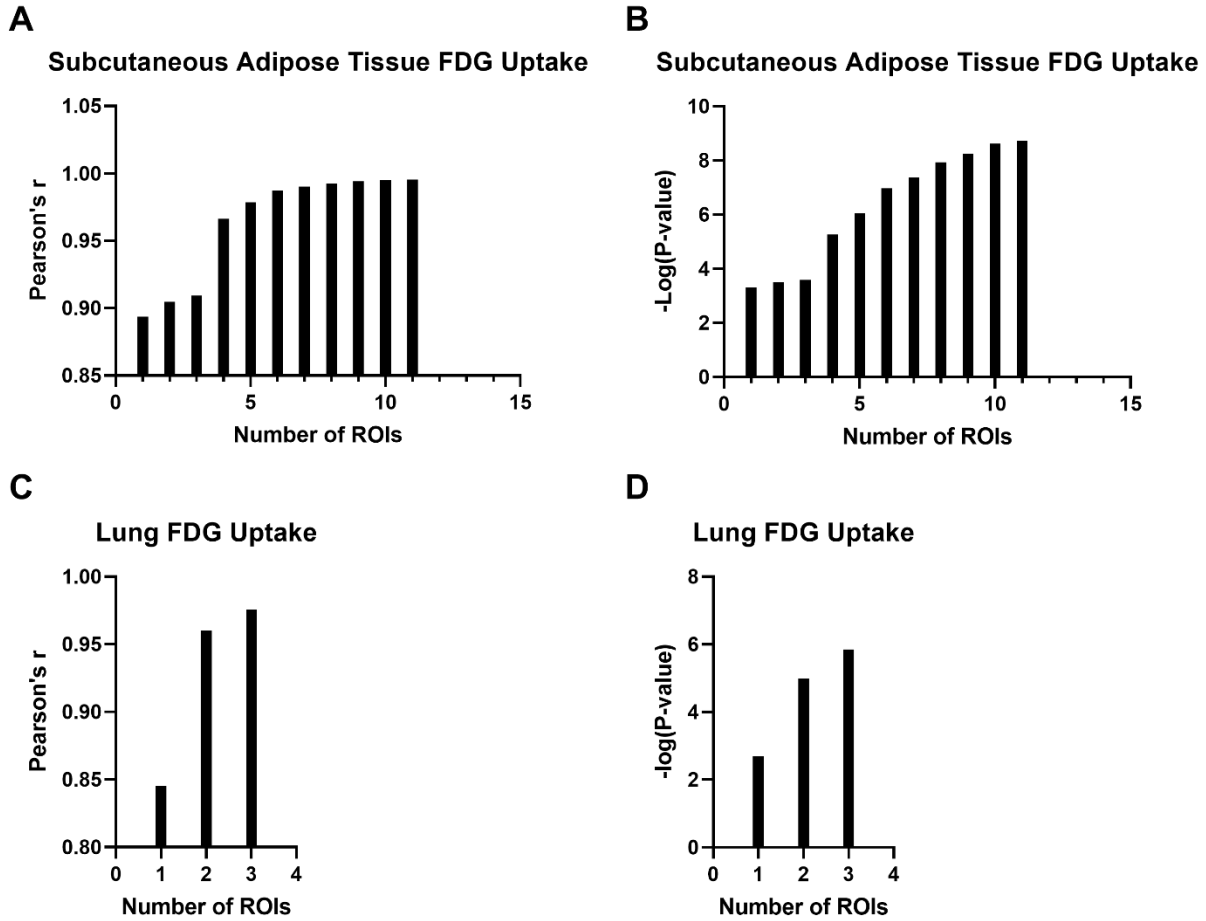

278

279 **Fig.4:** Correlation coefficient (A and C) and P-value (B and D) for the association between organ-  
280 specific FDG uptake measured using multiple manually selected ROIs and FDG uptake  
281 determined using deep learning-generated segmentation maps, as a function of number of  
282 manually selected ROIs, for the subcutaneous adipose tissue (A and B) and lungs (C and D). ROI:  
283 region of interest.

284
